# Supplementary material
Source: PubMed Central journal article supplement (PMC4715659)
Supplement: NIHMS731465-supplement-Supp_FigureS1.pdf [file NIHMS731465-supplement-Supp_FigureS1.pdf]

## Supporting Information

Figure S1

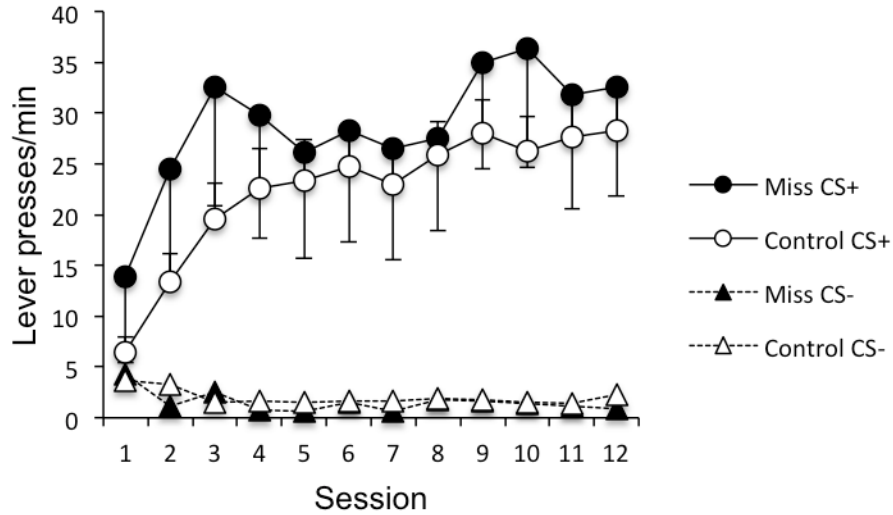

Sign-tracking rates of rats excluded (Miss;  $n = 4$ ) compared to Control rats from all 3 experiments (Control;  $n = 23$ ). A 2 (Group: Miss, Control)  $\times$  2 (Cue: CS+, CS-)  $\times$  12 (Session) ANOVA confirmed main effects of Cue  $F(1, 26) = 36.78, p < 0.001$  and Session  $F(11, 286) = 3.97, p < 0.001$ , as well as a Cue  $\times$  Session interaction  $F(11, 286) = 6.72, p < 0.001$ . The main effect of Group and other interactions were not significant (largest  $F(1, 26) = 0.97, p = 0.34$ ).
